# Supplementary material for: Over-Expression of Platelet-Derived Growth Factor-D Promotes Tumor Growth and Invasion in Endometrial Cancer
Source: MDPI journal article supplement (doi:10.3390/ijms15034780), 2014-03-18
Supplement: s1 [file s1]

## Supplementary Information

**Figure S1.** (a) Mesenchymal morphology of ECC-1 cells induced by PDGF-D over-expression (200×); (b) Epithelial morphology of Ishikawa cells induced by knockdown of *PDGF-D* (200×).

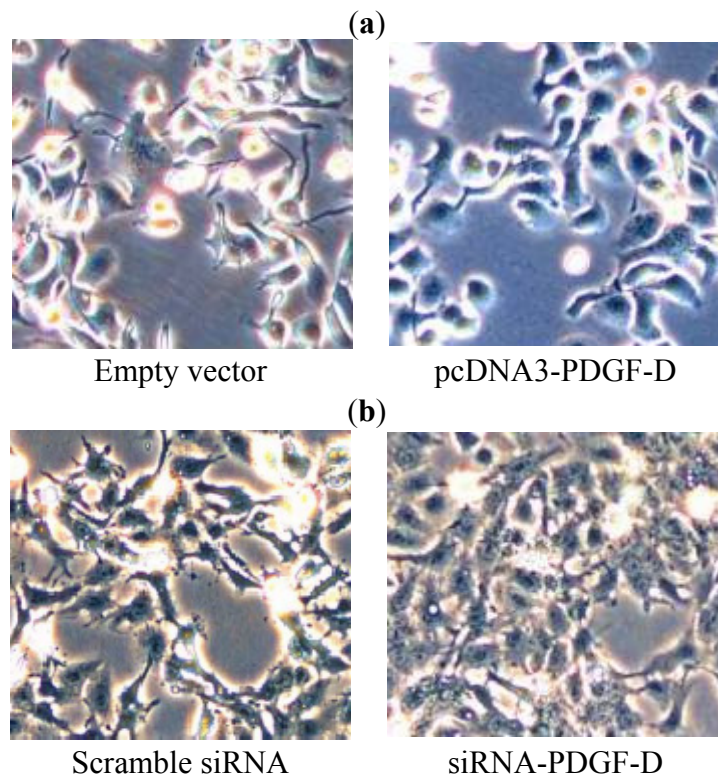

**Figure S2.** (a) The densitometric analysis and statistical analysis for Figure 3B; (b) the densitometric analysis and statistical analysis for Figure 4B.

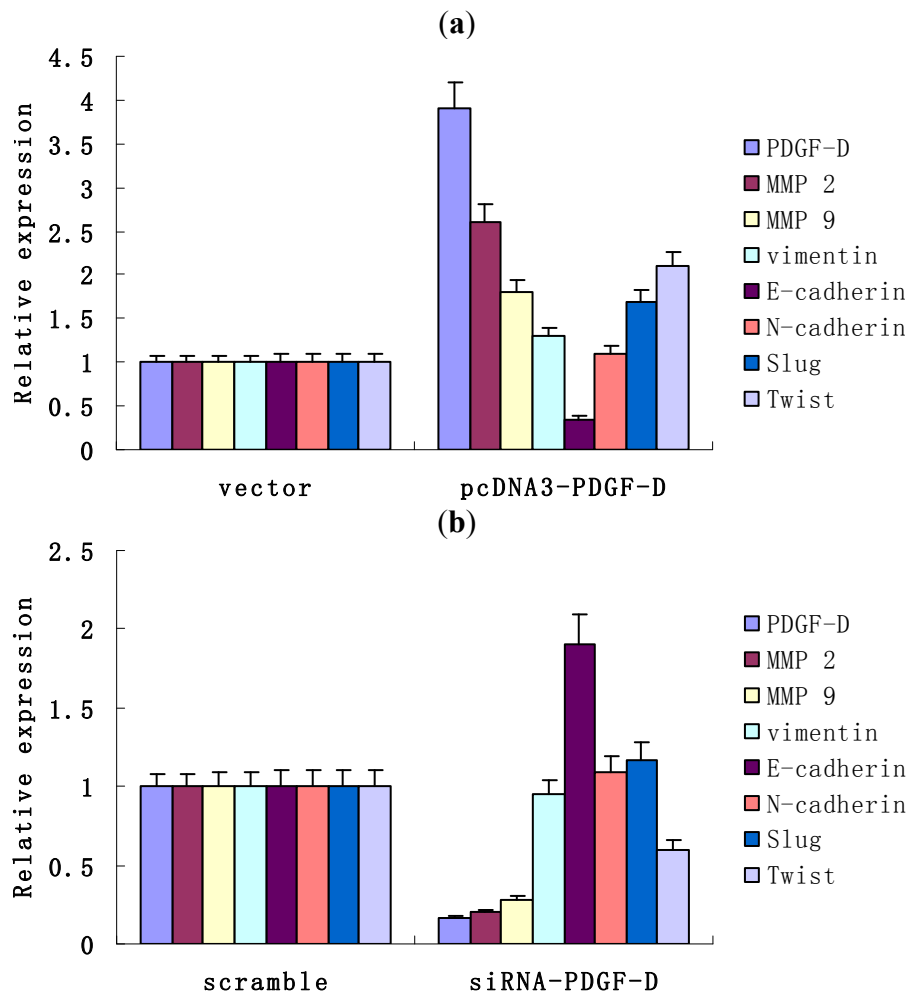

© 2014 by the authors; licensee MDPI, Basel, Switzerland. This article is an open access article distributed under the terms and conditions of the Creative Commons Attribution license (<http://creativecommons.org/licenses/by/3.0/>).
